# Supplementary material for: Structural and functional annotation of the MADS-box transcription factor family in grapevine
Source: PubMed Central journal article supplement (PMC4729134; doi:10.1186/s12864-016-2398-7), 2016-01-27

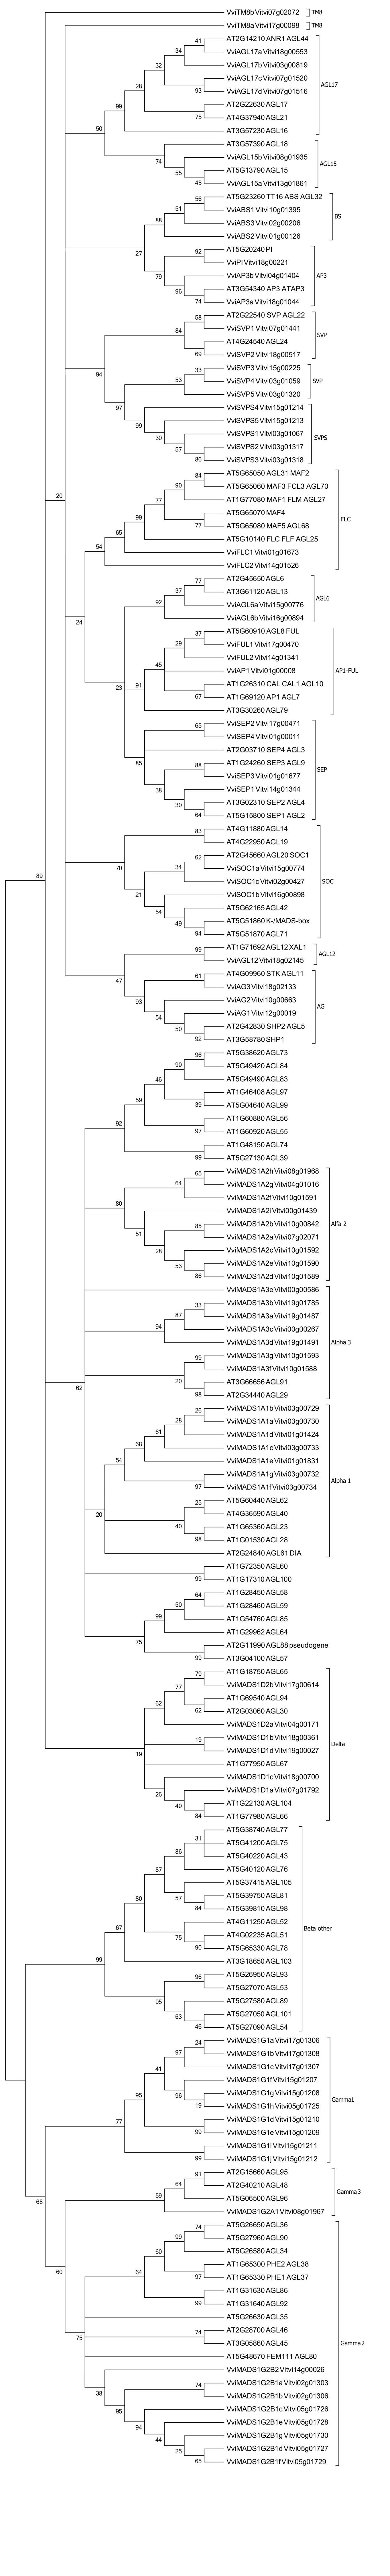

Supplement: 12864_2016_2398_MOESM3_ESM.pdf [file 12864_2016_2398_MOESM3_ESM.pdf]
